# Supplementary material for: Evolution of SSR diversity from wild types to U.S. advanced cultivars in the Andean and Mesoamerican domestications of common bean (Phaseolus vulgaris)
Source: PLoS One. 2019 Jan 31;14(1):e0211342. doi: 10.1371/journal.pone.0211342 (PMC6354994; doi:10.1371/journal.pone.0211342)
Supplement: S1 Table — (XLSX) [file pone.0211342.s001.xlsx]

## Sheet: Sheet1
S1 Table. Seed List of 195 accessions used in this study and Structure membership coefficient for K=2.
Label	Genotype	Market Class	Source	Gene pool1	Year of release	Pedigree	BMd45		BMd10		Pvag003		BM143		GATS91		BMd1		BM172		PVctt001		Pvag004		BMd20		BMd53		BMd37		BMd12		BM160		BM210		BMd25		BM151		BM188		PVat007		BMd42		BM212		Pvag001
60	115M (Black Rhino)	black	Jim Kelly - Michigan State Univ., E. Lansing	M			110	110	161	161	187	187	137	137	258	278	183	183	99	99	175	175	224	224	139	139	125	125	151	151	181	184	206	206	204	204	134	134	169	169	171	171	220	235	171	171	227	227	168
66	Agassiz	pinto	ADM, Edible Bean Specialists Inc., Decatur	M	1989		110	110	162	162	188	188	153	153	269	269	183	183	99	99	175	175	230	230	139	139	125	125	151	151	181	181	206	206	187	187	134	134	169	169	171	171	232	232	171	171	227	227	168
164	Albion	navy	Ken Kmiecik, Seminis Vegetable Seeds	M	1987	Seafarer/Turkish White	110	110	161	161	187	187	169	169	276	276	183	183	99	99	175	175	225	225	139	139	125	125	151	151	181	181	206	206	204	204	134	134	166	166	171	171	232	232	179	179	227	227	168
41	Alpine	great northern	Jim Kelly - Michigan State Univ., E. Lansing	M	1992	Starlight/P86297	110	110	162	162	188	188	175	175	278	278	183	183	99	99	178	178	224	224	149	149	125	125	155	155	181	181	206	206	189	189	134	134	171	171	171	171	227	227	171	171	227	227	168
157	Apache	pinto	Bill Dean, Idaho Seed Bean	M	1995		110	110	162	162	188	188	153	153	271	271	183	183	99	99	175	175	224	224	139	139	125	125	151	151	181	181	206	206	187	187	134	134	169	169	171	171	238	238	171	171	227	227	168
21	Arapaho	pinto	Mark Brick - Colorado State Univ., Fort Collins	M	1994	UI 114/MO19///1367-1/N203//Ouray, F4	110	110	162	162	188	188	153	153	269	269	183	183	99	99	175	175	230	230	139	139	125	125	151	151	184	184	206	206	187	187	134	134	169	169	171	171	230	230	171	171	227	227	168
138	Avalanche	navy	Juan Osorno- North Dakota State University, Fargo	M	1999	96–177–01–01/98–360,	110	110	164	164	190	190	137	137	256	256	183	183	99	99	175	175	224	224	147	147	125	125	151	151	181	181	206	206	204	204	134	134	166	166	171	171	233	233	177	177	227	227	168
165	Avanti	navy	Ken Kmiecik, Seminis Vegetable Seeds	M			110	110	164	164	190	190	137	137	278	278	183	183	99	99	187	187	225	225	139	139	125	125	151	151	181	181	206	206	204	204	134	134	166	166	171	171	233	233	171	171	227	227	168
42	Aztec	pinto	Jim Kelly - Michigan State Univ., E. Lansing	M	1992	CO81-12034/P86297	110	110	162	162	188	188	153	153	269	269	183	183	99	99	178	178	225	225	149	149	125	125	151	151	181	181	206	206	187	187	134	134	169	169	171	171	227	227	171	171	227	227	168
25	Badillo	light red kidney	Jim Beaver-Univ Puerto Rico Mayaguez	A	2009	AFR 285/PR9443-4	151	151	164	164	190	190	169	169	254	254	183	183	131	131	175	175	225	225	143	143	128	128	155	155	184	184	236	236	191	191	137	137	167	167	171	171	217	217	181	181	233	233	178
72	Baja	pinto	ADM, Edible Bean Specialists Inc., Decatur	M			110	110	162	162	188	188	153	153	273	273	183	183	99	99	178	178	224	224	139	139	125	125	151	151	181	181	206	206	204	204	134	134	169	169	172	172	236	236	171	171	229	229	168
76	Bandit	black	ADM, Edible Bean Specialists Inc., Decatur	M			110	110	164	164	190	190	155	155	258	258	183	183	99	99	187	187	224	224	149	149	125	125	151	151	184	184	206	206	199	199	134	134	166	166	172	172	227	227	177	177	227	227	168
2	BAT93	bayo	UCDavis	M			110	110	162	162	188	188	155	155	271	271	183	183	99	99	181	181	224	224	143	143	125	125	155	155	181	181	206	206	197	197	134	134	166	166	172	172	224	224	171	171	227	227	168
6	BelDakMi-RR-5	pinto	M.A. Pastor Corrales- USDA Beltsville	M	1991	NX-040/4/4-5753/3/Mayflower//NX-040/PI 181996.	110	110	162	162	188	188	137	137	278	278	183	183	99	99	175	175	224	224	149	149	125	125	155	155	181	181	208	208	199	199	134	134	169	169	171	171	227	227	171	171	227	227	168
7	BelDak-RR-1	pinto	M.A. Pastor Corrales- USDA Beltsville	M	1988	Bel 4-2537/3/Bel 4-844*2//Olathe/Mexico 235	110	110	162	162	188	188	153	153	269	269	183	183	99	99	175	175	224	224	139	139	125	125	151	151	181	181	206	206	187	187	134	134	169	169	171	171	238	238	171	171	227	227	168
5	BelMiNeb-RMR-3	great northern	M.A. Pastor Corrales- USDA Beltsville	M	1996	G94567/8/G91213*2/6/Starlight*2/4/Alpine*3/BelMiDak-RR-2	110	110	162	162	188	188	160	160	258	258	183	183	99	99	178	178	225	225	149	149	125	125	151	151	181	181	206	206	189	189	134	134	171	171	171	171	241	241	171	171	227	227	168
9	BelMiNeb-RMR-4	great northern	M.A. Pastor Corrales- USDA Beltsville	M	1998	34*2/3/P0X10//Fiesta/PI190078.	110	110	164	164	190	190	160	160	269	269	183	183	99	99	178	178	224	224	139	139	125	125	151	151	181	181	206	206	189	189	134	134	169	169	171	171	241	241	171	171	227	227	168
8	BelMiNeb-RMR-7	great northern	M.A. Pastor Corrales- USDA Beltsville	M	1999	Kodiak/9/P94232*2/8/92BR-3-1084B/7/BR3-1006/6/88-011-03*2/5/ Aztec/4/87-039-	110	110	162	162	188	188	160	160	258	258	183	183	99	99	178	178	225	225	149	149	125	125	151	151	181	181	206	206	189	189	134	134	169	169	171	171	227	227	171	171	227	227	168
11	BelMiNeb-RMR-8	navy	M.A. Pastor Corrales- USDA Beltsville	M	2003	Kodiak/9/P94232*2/8/92 BR-3-1084B/7/BR3-1006B/6/88-01103*2/5/ Aztec/4/87-039-34*2/3/P0X10//Fiesta/PI 190078.	110	110	162	162	188	188	175	175	258	258	183	183	99	99	178	178	230	230	149	149	125	125	151	151	181	181	206	206	189	189	134	134	171	171	171	171	227	227	171	171	227	227	168
4	BelMiNeb-RR-2	great northern	M.A. Pastor Corrales- USDA Beltsville	M	1993	Alpine*3/BelMiDak-RR-2	110	110	162	162	188	188	175	175	278	278	183	183	99	99	178	178	224	224	139	139	125	125	155	155	181	181	206	206	189	189	134	134	171	171	171	171	227	227	171	171	227	227	168
10	BelNeb-RR-1	great northern	M.A. Pastor Corrales- USDA Beltsville	M	1988	GN Harris/6/GN Harris/5/GN Harris/4/GN 1140//GN 1140/B-190/3/Olathe	110	110	162	162	188	188	153	153	280	280	183	183	99	99	175	175	224	224	139	139	125	125	155	155	181	181	206	206	189	189	134	134	?	?	171	171	232	232	171	171	227	227	168
51	Beluga	white kidney	Jim Kelly - Michigan State Univ., E. Lansing	A	1998	BEA (Italian Borlotto bean) / Lassen (white kidney bean)	151	151	161	161	187	187	169	169	254	254	186	186	128	128	175	175	225	225	143	143	128	128	151	151	184	184	236	236	187	187	137	137	167	167	171	171	215	215	181	181	233	233	178
172	Benton	green bean	PI collection	A	1983		151	151	161	161	187	187	153	153	275	275	186	186	131	131	184	184	225	225	143	143	125	125	155	155	184	184	282	282	191	191	137	137	169	169	171	171	217	217	171	171	216	216	178
85	Beryl	great northern	ADM, Edible Bean Specialists Inc., Decatur	M	1986		110	110	164	164	190	190	153	153	271	271	183	183	99	99	178	178	224	224	139	139	125	125	151	151	184	184	208	208	189	189	134	134	169	169	171	171	236	236	171	171	227	227	168
159	Bighorn	great northern	Bill Dean, Idaho Seed Bean	M			110	110	162	162	188	188	153	153	258	258	183	183	116	116	187	187	230	230	139	139	125	125	151	151	181	181	208	208	199	199	134	134	171	171	171	171	224	224	181	181	227	227	168
12	Bill Z	pinto	Mark Brick - Colorado State Univ., Fort Collins	M	1987	A56-244-39/UI 111//A56-244-8(3526)///Gloria	110	110	162	162	188	188	153	153	269	269	183	183	99	99	175	175	230	230	139	139	125	125	151	151	181	181	206	206	187	187	134	134	169	169	171	171	238	238	171	171	229	229	168
89	Black Knight	black	P. Griffiths/ Sandsted - Cornell University, Ithaca	M	1997	Midnight/6/Midnight/5/Midnight/4/Midnight/3/Midnight//(US 1140/Black Turtle Soup I) F3.	110	110	164	164	190	190	155	155	258	258	183	183	99	99	187	187	230	230	149	149	125	125	151	151	184	184	236	236	201	201	134	134	166	166	171	171	224	224	177	177	227	227	168
167	Black Velvet	black	Ken Kmiecik, Seminis Vegetable Seeds	M			110	110	164	164	190	190	137	137	256	256	183	183	99	99	187	187	224	224	147	147	125	125	151	151	184	184	206	206	201	201	134	134	166	166	172	172	230	230	177	177	227	227	168
39	Blackhawk	black	Jim Kelly - Michigan State Univ., E. Lansing	M	1989	Tuscola/CN49-242/2/Black Magic/3/Midnight	110	110	164	164	190	190	155	155	258	258	183	183	99	99	187	187	224	224	149	149	125	125	151	151	181	181	206	206	199	199	134	134	166	166	172	172	227	227	177	177	227	227	168
145	Blackjack	black	Clyde Butcher, Gentec INC Twin Falls, ID	M	1992		110	110	164	164	187	187	155	155	257	257	183	183	99	99	187	187	224	224	149	149	125	125	151	151	184	184	206	206	199	199	134	134	166	166	172	172	227	227	177	177	227	227	168
130	Blush	light red kidney	Phillip Miklas- USDA -ARS Prosser, WA	A	2004	84BR-1122/K-42	151	151	162	162	188	188	169	169	254	254	186	186	128	128	184	184	225	225	143	143	125	125	151	151	184	184	236	236	187	187	137	137	167	167	171	171	217	217	181	181	233	233	178
173	Bronco	green bean	Seminis	A	1986		151	151	161	161	187	187	153	153	275	275	186	186	116	116	184	184	225	225	143	143	125	125	155	155	184	184	282	282	191	191	134	134	169	169	171	171	217	217	171	171	233	233	178
63	Buchskin	pinto	ADM, Edible Bean Specialists Inc., Decatur	M			110	110	162	162	188	188	153	153	269	269	183	183	99	99	187	187	230	230	139	139	125	125	151	151	181	181	206	206	204	204	134	134	169	169	171	171	230	230	171	171	229	229	168
35	Bunsi	navy	Jim Kelly - Michigan State Univ., E. Lansing	M	1982		110	110	162	162	188	188	137	137	256	256	188	188	99	99	187	187	?	?	147	147	125	125	151	151	181	181	206	206	204	204	139	139	169	169	172	172	236	236	171	171	227	227	168
117	Burke	pinto	Phillip Miklas- USDA -ARS Prosser, WA	M			110	110	162	162	188	188	175	175	278	278	183	183	99	99	175	175	230	230	149	149	125	125	151	151	181	181	206	206	187	187	134	134	169	169	171	171	227	227	171	171	229	229	168
160	Buster	pinto	Ken Kmiecik, Seminis Vegetable Seeds	M			110	110	162	162	188	188	175	175	278	278	183	183	99	99	178	178	225	225	149	149	125	125	151	151	181	181	206	206	187	187	134	134	169	169	172	172	227	227	171	171	227	227	168
36	C-20	navy	Jim Kelly - Michigan State Univ., E. Lansing	M	1983	Jamapa/NEP-2//W-20/Kentwood	110	110	164	164	190	190	137	137	256	256	183	183	99	99	187	187	224	224	147	147	125	125	151	151	181	181	206	206	204	204	134	134	166	166	172	172	227	227	171	171	227	227	168
68	Camelot	dark red kidney	ADM, Edible Bean Specialists Inc., Decatur	A	1990		151	151	161	161	187	187	169	169	254	254	186	186	131	131	175	175	225	225	139	139	128	128	155	155	184	184	280	280	187	187	137	137	167	167	171	171	215	215	181	181	233	233	178
148	CDRK	dark red kidney	Steven Temple - Univ. of California, Davis	A			151	151	161	161	187	187	169	169	239	239	186	186	128	128	184	184	225	225	143	143	128	128	151	151	184	184	238	238	187	187	137	137	167	167	171	171	215	215	181	181	233	233	178
195	CELRK	light red kidney	Steven Temple - Univ. of California, Davis	A			151	151	161	161	187	187	169	169	254	254	186	186	131	131	175	175	225	225	143	143	128	128	151	151	184	184	236	236	187	187	137	137	167	167	171	171	217	217	181	181	233	233	178
29	Charlevoix	dark red kidney	Jim Kelly - Michigan State Univ., E. Lansing	A	1964		151	151	161	161	187	187	169	169	239	239	186	186	128	128	184	184	225	225	143	143	128	128	151	151	181	181	282	282	187	187	137	137	167	167	171	171	215	215	181	181	233	233	178
114	Chase	pinto	Carlos Urrea - Univ. of Nebraska, Scottsbluff	M	1993	GN Nebr. #1 Sel. 27, Tacaragua, and Pinto UI 111	110	110	164	164	190	190	153	153	272	272	183	183	99	99	175	175	224	224	139	139	125	125	155	155	181	181	206	206	199	199	134	134	169	169	171	171	236	236	171	171	227	227	168
50	Chinook 2000	light red kidney	Jim Kelly - Michigan State Univ., E. Lansing	A	1998	Anthracnose resistant selection within the commerical light Red Kidney bean cultivar Chinook	151	151	161	161	187	187	169	169	258	258	186	186	131	131	175	175	225	225	143	143	128	128	151	151	184	184	282	282	187	187	134	134	167	167	171	171	215	215	181	181	233	233	178
94	Common Pinto	pinto	Shree Singh - University of Idaho, Kimberly	M			110	110	162	162	188	188	153	153	269	269	183	183	99	99	175	175	230	230	139	139	125	125	151	151	181	181	206	206	204	204	134	134	169	169	171	171	238	238	171	171	229	229	168
54	Condor	black	Jim Kelly - Michigan State Univ., E. Lansing	M	2004	Derived from a cross between black bean cultivars Phantom and Black Jack	110	110	164	164	190	190	137	137	256	256	183	183	99	99	175	175	224	224	139	139	125	125	151	151	181	181	206	206	201	201	134	134	166	166	172	172	227	227	179	179	227	227	168
174	Contender	green bean	OSU	A			151	151	161	161	187	187	153	153	254	254	183	183	131	131	184	184	225	225	143	143	125	125	151	151	184	184	236	236	191	191	137	137	167	167	171	171	223	223	171	171	233	233	178
175	Corbette Rufugee	green bean	OSU	A			110	110	162	162	188	188	153	153	273	273	186	186	116	116	184	184	225	225	143	143	125	125	151	151	184	184	206	206	191	191	137	137	167	167	171	171	217	217	181	181	233	233	178
59	Cornell 49-242	black	Jim Kelly - Michigan State Univ., E. Lansing	M			110	110	161	161	187	187	137	137	258	278	183	183	99	99	175	175	224	224	139	139	125	125	153	153	181	184	206	206	204	204	134	134	169	169	171	171	220	235	171	171	227	227	168
193	Coyne	great northern	Carlos Urrea - Univ. of Nebraska, Scottsbluff	M	2009	GN F7:F8 three-way cross (G95023/Weihing//BMN-RMR-11)	110	110	162	162	158	158	153	153	269	269	183	183	99	99	187	187	225	225	147	147	125	125	151	151	181	181	206	206	189	189	134	134	171	171	171	171	238	238	171	171	227	227	168
141	Crestwood	navy	Clyde Butcher, Gentec INC Twin Falls, ID	M	1986	Ex Rico 23*3/PI 326418	110	110	162	162	188	188	175	175	258	258	183	183	99	99	175	175	224	224	147	147	125	125	151	151	181	181	206	206	204	204	134	134	166	166	172	172	236	236	177	177	227	227	168
20	Croissant	pinto	Mark Brick - Colorado State Univ., Fort Collins	M	2001	BelDakMi-RR-3/CO07010-2//WM2-93-5	110	110	162	162	188	188	153	153	269	269	183	183	99	99	178	178	224	224	139	139	125	125	155	155	181	181	206	206	187	187	134	134	169	169	171	171	224	224	171	171	227	227	168
33	Domino	black	Jim Kelly - Michigan State Univ., E. Lansing	M	1982	NEP-2/Black Turtle Soup	110	110	162	162	188	188	137	137	256	256	183	183	99	99	187	187	224	224	149	149	125	125	151	151	184	184	206	206	201	201	134	134	166	166	172	172	227	227	177	177	227	227	168
24	DPC-40	black	Jim Beaver-Univ Puerto Rico Mayaguez	M			110	110	164	164	190	190	177	177	256	278	183	183	99	99	187	187	224	224	139	139	125	125	151	151	184	184	206	206	199	199	134	134	166	166	172	172	227	227	171	171	227	227	168
169	Drake	dark red kidney	Ken Kmiecik, Seminis Vegetable Seeds	A	1993		151	151	161	161	187	187	169	169	254	254	186	186	128	128	175	175	225	225	143	143	128	128	151	151	184	184	282	282	187	187	137	137	167	167	171	171	215	215	181	181	227	227	178
73	Durango	pinto	ADM, Edible Bean Specialists Inc., Decatur	M			110	110	162	162	188	188	153	153	273	273	183	183	99	99	175	175	224	224	139	139	125	125	151	151	181	181	215	215	204	204	134	134	169	169	171	171	236	236	171	171	227	227	168
176	Dutch Double White	green bean	Seminis	M			110	110	161	161	187	187	153	153	282	282	186	186	99	99	184	184	225	225	143	143	125	125	151	151	181	181	204	204	204	204	134	134	169	169	171	171	236	236	171	171	227	227	168
139	Eclipse	black	Juan Osorno- North Dakota State University, Fargo	M			110	110	164	164	190	190	137	137	278	278	183	183	99	99	187	187	224	224	147	147	125	125	151	151	184	184	203	203	201	201	134	134	166	166	172	172	227	227	179	179	227	227	168
112	Emerson	great northern	Carlos Urrea - Univ. of Nebraska, Scottsbluff	M	1971	Great Northern 1140 / PI 165078	110	110	162	162	188	188	153	153	280	280	183	183	99	99	175	175	230	230	139	139	125	125	155	155	181	181	206	206	189	189	134	134	171	171	171	171	233	233	171	171	227	227	168
79	Ensign	navy	ADM, Edible Bean Specialists Inc., Decatur	M			110	110	162	162	188	188	137	137	256	256	183	183	99	99	175	175	224	224	147	147	125	125	151	151	181	181	206	206	204	204	134	134	169	169	172	172	233	233	177	177	227	227	168
144	Envoy	navy	Clyde Butcher, Gentec INC Twin Falls, ID	M	1994		110	110	162	162	188	188	137	137	278	278	183	183	99	99	187	187	225	225	139	139	125	125	151	151	181	181	236	236	204	204	134	134	166	166	171	171	236	236	179	179	227	227	168
177	Esquire	green bean	Syngenta	A			151	151	161	161	187	187	137	137	278	278	183	183	99	99	184	184	225	225	143	143	125	125	155	155	181	181	284	284	204	204	134	134	171	171	171	171	217	217	171	171	216	216	168
178	EZ Pick	green bean	OSU	A	1985		151	151	161	161	187	187	137	137	278	278	183	183	99	99	184	184	225	225	143	143	125	125	155	155	181	181	204	204	201	201	134	134	171	171	171	171	217	217	171	171	233	233	178
65	Fargo	pinto	ADM, Edible Bean Specialists Inc., Decatur	M			110	110	162	162	188	188	153	153	269	269	183	183	99	99	175	175	230	230	139	139	125	125	155	155	181	181	206	206	187	187	134	134	169	169	171	171	230	230	171	171	227	227	168
128	Fiero	dark red kidney	Phillip Miklas- USDA -ARS Prosser, WA	A	2004	MONTCALM / K-59-7. 91GH030-3-1-B-B-PRB(a)-1-PRB-B-B	151	151	161	161	187	187	169	169	254	254	186	186	131	131	175	175	225	225	139	139	128	128	155	155	184	184	273	273	187	187	137	137	167	167	171	171	217	217	181	181	233	233	178
158	Fiesta	pinto	Bill Dean, Idaho Seed Bean	M	1981	UI lll//a Great Northern cultivar/UI 111	110	110	162	162	188	188	153	153	269	269	183	183	99	99	175	175	224	224	139	139	125	125	151	151	181	181	206	206	204	204	134	134	169	169	171	171	238	238	171	171	227	227	168
15	Fisher	pinto	Mark Brick - Colorado State Univ., Fort Collins	M	1995	San Juan/A56-240//Yellow Jacket///Olathe/Ar83-2, F5.	110	110	162	162	188	188	153	153	271	271	183	183	99	99	178	178	224	224	139	139	125	125	151	151	181	181	206	206	204	204	134	134	169	169	171	171	232	232	171	171	227	227	168
64	Flint	pinto	ADM, Edible Bean Specialists Inc., Decatur	M	1989		110	110	162	162	188	188	153	153	273	273	183	183	99	99	175	175	230	230	139	139	125	125	151	151	181	181	206	206	204	204	134	134	169	169	171	171	238	238	171	171	229	229	168
69	Fox Fire	light red kidney	ADM, Edible Bean Specialists Inc., Decatur	A	1990		151	151	162	162	188	188	169	169	254	254	186	186	131	131	184	184	225	225	143	143	128	128	155	155	184	184	236	236	187	187	137	137	167	167	171	171	220	220	181	181	233	233	178
136	Frontier	pinto	Juan Osorno- North Dakota State University, Fargo	M	1998	PX-057[83-003-A*2(Fiesta/Black Magic)/4-842//83B229/3/5-383]/Sierra.	110	110	162	162	188	188	175	175	269	269	183	183	99	99	178	178	224	224	139	139	125	125	151	151	181	181	206	206	187	187	134	134	171	171	171	171	238	238	171	171	227	227	168
155	Gala	pinto	Bill Dean, Idaho Seed Bean	M			110	110	162	162	188	188	153	153	273	273	183	183	99	99	175	175	230	230	139	139	125	125	151	151	181	181	206	206	204	204	134	134	169	169	171	171	238	238	171	171	229	229	168
179	Gallatin 50	green bean	Syngenta	A			151	151	161	161	187	187	153	153	275	275	186	186	116	116	184	184	225	225	143	143	125	125	155	155	184	184	282	282	191	191	137	137	171	171	171	171	217	217	179	179	233	233	178
146	Gemini	great northern	Kelley Bean, Scottsbluff NE	M	2010		110	110	162	162	188	188	153	153	269	269	183	183	99	99	175	175	224	224	139	139	125	125	151	151	181	181	206	206	189	189	134	134	169	169	171	171	233	233	171	171	229	229	168
108	GN Harris	great northern	Carlos Urrea - Univ. of Nebraska, Scottsbluff	M	1980	bulk of early maturing GN Valley plants	110	110	162	162	188	188	153	153	280	280	183	183	99	99	178	178	224	224	139	139	125	125	155	155	181	181	206	206	189	189	134	134	169	169	171	171	236	236	171	171	227	227	168
109	GN Star	great northern	Carlos Urrea - Univ. of Nebraska, Scottsbluff	M	1975	GN Nebraska #1 sel.27*6/GN Nebraska #1 sel. 27/PI 165078	110	110	162	162	188	188	153	153	280	280	183	183	99	99	178	178	230	230	139	139	125	125	155	155	181	181	206	206	189	189	134	134	169	169	171	171	236	236	171	171	227	227	168
107	GN#1Sel27	great northern	Carlos Urrea - Univ. of Nebraska, Scottsbluff	M			110	110	162	162	188	188	153	153	280	280	183	183	99	99	178	178	224	224	139	139	125	125	155	155	181	181	206	206	189	189	134	134	169	169	171	171	236	236	171	171	227	227	168
180	Goldmine	green bean	Seminis	A			151	151	161	161	187	187	153	153	276	276	186	186	116	116	184	184	225	225	143	143	125	125	155	155	184	184	282	282	191	191	137	137	171	171	171	171	217	217	171	171	216	216	178
14	Grand Mesa	pinto	Mark Brick - Colorado State Univ., Fort Collins	M	1994	UI 114/MO19/3/1367-1/N203//Ouray	110	110	162	162	188	188	153	153	269	269	183	183	99	99	175	175	224	224	139	139	125	125	151	151	181	181	206	206	216	216	134	134	169	169	176	176	232	232	171	171	227	227	168
140	Hatton	pinto	Juan Osorno- North Dakota State University, Fargo	M	1996	83-003A/40842//83B229/3/5-383/83003/4/T295/TOPAZ	110	110	162	162	188	188	153	153	256	256	183	183	99	99	175	175	230	230	139	139	125	125	151	151	181	181	206	206	204	204	134	134	169	169	171	171	233	233	171	171	229	229	168
120	Holberg	pinto	Phillip Miklas- USDA -ARS Prosser, WA	M	1983	Viva Pink // UI-114 * / PI203958	110	110	162	162	188	188	153	153	269	269	183	183	99	99	178	178	230	230	139	139	125	125	151	151	181	181	206	206	204	204	134	134	169	169	171	171	230	230	171	171	229	229	168
43	Huron	navy	Jim Kelly - Michigan State Univ., E. Lansing	M	1994	C-20/Harokent	110	110	162	162	188	188	137	137	278	278	183	183	99	99	178	178	223	223	139	139	125	125	151	151	181	181	206	236	204	204	134	134	173	173	171	171	224	224	171	171	227	227	168
181	Hystyle	green bean	Seminis	A	1986		151	151	161	161	187	187	153	153	275	275	186	186	131	131	184	184	225	225	143	143	125	125	155	155	184	184	282	282	191	191	137	137	169	169	171	171	217	217	171	171	216	216	178
34	Isabella	light red kidney	Jim Kelly - Michigan State Univ., E. Lansing	A	1986	Redkloud/Mecosta	151	151	162	162	188	188	169	169	254	254	186	186	131	131	184	184	225	225	143	143	128	128	151	151	184	184	282	282	187	187	137	137	167	167	171	171	217	217	181	181	233	233	178
45	Isles	dark red kidney	Jim Kelly - Michigan State Univ., E. Lansing	A	1994	X82405/Isabella	151	151	161	161	187	187	169	169	239	239	186	186	131	131	184	184	226	226	139	139	128	128	151	151	184	184	282	282	187	187	137	137	167	167	171	171	215	215	181	181	227	227	178
84	Ivory	great northern	ADM, Edible Bean Specialists Inc., Decatur	M			110	110	162	162	188	188	153	153	280	280	183	183	99	99	184	184	224	224	139	139	125	125	155	155	181	181	206	206	189	189	134	134	169	169	171	171	236	236	171	171	227	227	168
154	Jackpot	pinto	Bill Dean, Idaho Seed Bean	M			110	110	162	162	188	188	153	153	276	276	183	183	99	99	175	175	224	224	139	139	125	125	155	155	181	181	206	206	187	187	134	134	169	169	171	171	232	232	171	171	229	229	168
182	Jade	green bean	Seminis	A	1991		151	151	161	161	187	187	153	153	275	275	186	186	116	116	184	184	225	225	143	143	125	125	155	155	184	184	206	206	191	191	134	134	169	169	171	171	217	217	171	171	227	227	178
52	Jaguar	black	Jim Kelly - Michigan State Univ., E. Lansing	M	2000	B90211/N90616	110	110	164	164	190	190	137	137	256	256	183	183	99	99	175	175	224	224	139	139	125	125	151	151	181	181	206	206	199	199	134	134	166	166	172	172	227	227	179	179	227	227	168
3	JALO EPP553	canario	UCDavis	A			151	151	161	161	187	187	177	177	254	254	183	183	116	116	184	184	225	225	143	143	128	128	155	155	184	184	238	238	191	191	137	137	167	167	170	170	215	215	179	179	233	233	178
118	JM-126	pinto	Phillip Miklas- USDA -ARS Prosser, WA	M	1994	Pinto NW-410/2/Nep II/NW-410 (2)	110	110	162	162	188	188	153	153	276	276	183	183	99	99	175	175	230	230	139	139	125	125	155	155	181	181	206	206	187	187	134	134	169	169	171	171	238	238	171	171	227	227	178
115	JM-24	great northern	Phillip Miklas- USDA -ARS Prosser, WA	M	1994	Pinto NW-410//NW-410/NEP-2	110	110	162	162	188	188	137	137	256	256	183	183	99	99	187	187	224	224	139	139	125	125	151	151	181	181	206	206	201	201	134	134	169	169	172	172	236	236	171	171	227	227	168
126	Kamiakin	light red kidney	Phillip Miklas- USDA -ARS Prosser, WA	A	1994	F11 selection from Royal Red/Redkote	151	151	162	162	188	188	169	169	239	239	183	183	128	128	184	184	224	224	143	143	125	125	155	155	184	184	273	273	187	187	137	137	167	167	171	171	221	221	181	181	233	233	178
129	Kardinal	light red kidney	Phillip Miklas- USDA -ARS Prosser, WA	A	1994	F10 selection from Manitou/5/UI-114 Pinto/3/UI-112 Pinto/2/ UI-112/PI 203958/4/Jacob's Cattle	151	151	161	161	188	188	169	169	239	239	186	186	128	128	184	184	225	225	143	143	125	125	155	155	184	184	273	273	187	187	137	137	167	167	171	171	221	221	181	181	233	233	178
95	Kimberly	pinto	Shree Singh - University of Idaho, Kimberly	M	2008	Poncho /G 17341// Kodiak /BelDakMi-RMR-14	110	110	162	162	188	188	155	155	269	269	183	183	99	99	178	178	230	230	139	139	125	125	151	151	181	181	206	206	187	187	134	134	169	169	171	171	236	236	171	171	229	229	178
47	Kodiak	pinto	Jim Kelly - Michigan State Univ., E. Lansing	M	1998	P90557 (pinto breeding line from MSU) / G91213 (great northern breeding line from MSU)	110	110	162	162	188	188	175	175	278	278	183	183	99	99	178	178	224	224	149	149	125	125	151	151	181	181	206	206	187	187	134	134	171	171	172	172	227	227	181	181	227	227	168
71	La Paz	pinto	ADM, Edible Bean Specialists Inc., Decatur	M			151	151	161	161	187	187	153	153	274	274	186	186	116	116	184	184	225	225	143	143	125	125	155	155	184	184	284	284	191	191	137	137	167	167	171	171	215	215	171	171	227	227	178
97	Labrador	green bean	Seminis	A	1983		110	110	162	162	188	188	137	137	276	276	183	183	99	99	175	175	226	226	139	139	125	125	151	151	181	181	206	206	204	204	134	134	169	169	171	171	233	233	171	171	216	216	168
37	Laker	navy	Jim Kelly - Michigan State Univ., E. Lansing	M	1987	ICA-Pijao/NEP-2//W-20/Kentwood	151	151	161	161	187	187	192	192	256	256	183	183	116	116	184	184	225	225	143	143	128	128	155	155	184	184	236	236	191	191	137	137	167	167	171	171	221	221	181	181	233	233	178
183	Landreth's Stringless Green Pod	green bean	OSU	A			110	110	162	162	188	188	153	153	269	269	183	183	99	99	178	178	230	230	149	149	125	125	151	151	184	184	206	206	187	187	134	134	171	171	172	172	227	227	177	177	227	227	168
133	Lariat	pinto	Juan Osorno- North Dakota State University, Fargo	M	2007	99-031/(T1255/‘Aztec’//‘Winchester’/3/P96753/4/Maverick)	110	110	162	162	188	188	153	153	278	278	183	183	99	99	178	178	230	230	139	139	125	125	151	151	181	181	206	206	201	201	134	134	167	167	171	171	224	224	171	171	227	227	168
170	Lark	light red kidney	Ken Kmiecik, Seminis Vegetable Seeds	A	1985	bulk of 12 selections out of Redkloud	151	151	162	162	188	188	169	169	254	254	186	186	131	131	184	184	225	225	143	143	128	128	155	155	184	184	236	236	187	187	137	137	167	167	171	171	217	217	181	181	233	233	178
191	Lassen	white kidney	ADM, Edible Bean Specialists Inc., Decatur	A	1985	white-seeded mutants of Sacramento	151	151	?	?	187	187	169	169	254	254	186	186	131	131	184	184	225	225	143	143	128	128	151	151	184	184	236	236	187	187	137	137	167	167	171	171	217	217	181	181	233	233	178
77	Loreto	black	ADM, Edible Bean Specialists Inc., Decatur	M			110	110	164	164	190	190	137	137	256	256	183	183	99	99	175	175	224	224	139	139	125	125	151	151	181	181	206	206	199	199	134	134	166	166	172	172	236	236	171	171	227	227	168
163	Mariah	pinto	Ken Kmiecik, Seminis Vegetable Seeds	M			110	110	162	162	188	188	153	153	278	278	183	183	99	99	178	178	230	230	149	149	125	125	155	155	181	181	206	206	187	187	134	134	171	171	171	171	227	227	177	177	227	227	168
86	Marquis	great northern	ADM, Edible Bean Specialists Inc., Decatur	M	1989		110	110	164	164	190	190	153	153	271	271	183	183	99	99	175	175	224	224	139	139	125	125	151	151	181	181	208	208	189	189	134	134	169	169	171	171	?	?	171	171	227	227	168
184	Masai	green bean	OSU	A			151	151	161	161	187	187	153	153	254	254	183	183	99	99	197	197	225	225	139	139	125	125	155	155	184	184	282	282	204	204	134	134	167	167	171	171	217	217	171	171	233	233	178
48	Matterhorn	great northern	Jim Kelly - Michigan State Univ., E. Lansing	M	1998	Alpine (commercial great northern bean) / X90012 (breeding line from MSU)	110	110	162	162	188	188	175	175	278	278	183	183	99	99	178	178	224	224	149	149	125	125	155	155	181	181	206	206	189	189	134	134	171	171	172	172	227	227	171	171	227	227	168
132	Maverick	pinto	Juan Osorno- North Dakota State University, Fargo	M	1996	PX-087 (Fiesta/Black Magic//83B229)/87-049-01 (C081-12034/T295)	110	110	162	162	188	188	153	153	278	278	183	183	99	99	175	175	230	230	149	149	125	125	155	155	181	181	206	206	187	187	134	134	171	171	171	171	227	227	171	171	227	227	168
153	Max	pinto	Bill Dean, Idaho Seed Bean	M			110	110	162	162	188	188	153	153	269	269	183	183	99	99	175	175	230	230	139	139	125	125	151	151	181	181	206	206	187	187	134	134	169	169	171	171	232	232	171	171	229	229	168
38	Mayflower	navy	Jim Kelly - Michigan State Univ., E. Lansing	M	1987	NEP-2/Black Turtle Soup//2W-33-2/3/C-20	110	110	164	164	190	190	137	137	256	256	183	183	99	99	187	187	224	224	149	149	125	125	151	151	184	184	203	203	204	204	134	134	166	166	171	171	227	227	179	179	227	227	168
171	McHale	navy	Ken Kmiecik, Seminis Vegetable Seeds	M			110	110	164	164	190	190	169	169	278	278	183	183	99	99	187	187	225	225	147	147	125	125	151	151	181	181	206	206	204	204	134	134	166	166	172	172	227	227	171	171	227	227	168
82	Medalist	navy	ADM, Edible Bean Specialists Inc., Decatur	M			110	110	164	164	190	190	137	137	256	256	183	183	99	99	187	187	225	225	139	139	125	125	151	151	184	184	206	206	204	204	134	134	166	166	172	172	227	227	171	171	227	227	168
161	Medicine Hat	pinto	Ken Kmiecik, Seminis Vegetable Seeds	M			110	110	162	162	188	188	153	153	269	269	183	183	99	99	178	178	230	230	149	149	125	125	151	151	181	181	206	206	187	187	134	134	169	169	171	171	227	227	171	171	227	227	168
26	Michelite	navy	Jim Kelly - Michigan State Univ., E. Lansing	M	1938	Robust/Early Prolific	110	110	164	164	190	190	137	137	256	256	183	183	99	99	187	187	224	224	149	149	125	125	151	151	184	184	206	206	199	199	134	134	166	166	172	172	227	227	177	177	227	227	168
1	Midas	green bean	UCDavis	A			151	151	161	161	187	187	147	147	254	274	186	186	116	116	184	184	225	225	143	143	126	126	151	151	181	181	204	204	191	191	137	137	165	165	170	170	217	217	171	171	233	233	178
166	Midland	navy	Ken Kmiecik, Seminis Vegetable Seeds	M	1983	Seafarer//Seafarer/California Small White	110	110	161	161	187	187	137	137	278	278	183	183	99	99	184	184	225	225	139	139	125	125	151	151	181	181	206	206	204	204	134	134	166	166	171	171	236	236	179	179	227	227	168
88	Midnight	black	P. Griffiths/ Sandsted - Cornell University, Ithaca	M	1981	bulk of composite NY lines 70001, 70002, 70003	110	110	164	164	190	190	155	155	258	258	183	183	99	99	187	187	224	224	149	149	125	125	151	151	184	184	206	206	199	199	134	134	166	166	172	172	227	227	177	177	227	227	168
30	Montcalm	dark red kidney	Jim Kelly - Michigan State Univ., E. Lansing	A		Great Northern #1/Dark Red Kidney	151	151	161	161	187	187	169	169	254	254	186	186	131	131	175	175	225	225	139	139	128	128	151	151	184	184	280	280	187	187	137	137	167	167	171	171	215	215	181	181	233	233	178
16	Montrose	pinto	Mark Brick - Colorado State Univ., Fort Collins	M	1999	BelNeb2 x GH 196	110	110	162	162	188	188	153	153	269	269	183	183	99	99	175	175	224	224	139	139	125	125	151	151	181	181	206	206	204	204	134	134	169	169	171	171	227	227	171	171	229	229	168
22	Morales	small white	Jim Beaver-Univ Puerto Rico Mayaguez	M	1998	Arroyo Loro / Don Silvio	110	110	164	164	190	190	177	177	256	256	183	183	99	99	175	175	225	225	147	147	125	125	151	151	184	184	203	203	199	199	134	134	169	169	172	172	222	222	177	177	227	227	168
83	Navigator	navy	ADM, Edible Bean Specialists Inc., Decatur	M			110	110	164	164	190	190	137	137	256	256	183	183	99	99	187	187	224	224	147	147	125	125	151	151	184	184	203	203	204	204	134	134	166	166	172	172	227	227	179	179	227	227	168
135	ND-307	pinto	Juan Osorno- North Dakota State University, Fargo	M	2008	USPTCBB-3/Matterhorn//Maverick	110	110	162	162	188	188	175	175	278	278	183	183	99	99	178	178	224	224	139	139	125	125	155	155	181	181	206	206	187	187	134	134	169	169	171	171	227	235	171	171	227	227	168
32	Neptune	navy	Jim Kelly - Michigan State Univ., E. Lansing	M	1982	MSU #31906/San Fernando//Seafarer	110	110	164	164	190	190	137	137	256	256	183	183	99	99	187	187	224	224	149	149	125	125	151	151	184	184	206	206	199	199	134	134	166	166	172	172	227	227	177	177	227	227	168
46	Newport	navy	Jim Kelly - Michigan State Univ., E. Lansing	M	1995	N85606/Harokent	110	110	162	162	188	188	137	137	278	278	183	183	99	99	187	187	226	226	143	143	125	125	151	151	181	181	206	206	199	199	134	134	166	166	172	172	238	238	177	177	233	233	168
119	Nodak	pinto	Phillip Miklas- USDA -ARS Prosser, WA	M	1984	Red Mex UI 35//Red Mex UI 35/PI 203958/3/Royal Red Kidney/4/GN 1140	110	110	162	162	188	188	153	153	269	269	183	183	99	99	187	187	230	230	139	139	125	125	151	151	181	181	206	206	204	204	134	134	169	169	171	171	230	230	171	171	229	229	168
137	Norstar	navy	Juan Osorno- North Dakota State University, Fargo	M	1991	C-20/Fleetwood, F3 Selection	110	110	164	164	190	190	137	137	278	278	183	183	99	99	187	187	224	224	147	147	125	125	151	151	181	181	236	236	204	204	134	134	166	166	172	172	227	227	171	171	216	216	168
123	NW-410	pinto	Phillip Miklas- USDA -ARS Prosser, WA	M	1982	Sutter Pink/Pinto UI-114	110	110	162	162	188	188	153	153	269	269	183	183	99	99	175	175	230	230	139	139	125	125	151	151	181	181	206	206	204	204	134	134	169	169	171	171	230	230	171	171	229	229	168
122	NW590	pinto	Phillip Miklas- USDA -ARS Prosser, WA	M			110	110	162	162	188	188	153	153	273	273	183	183	99	99	175	175	230	230	139	139	125	125	151	151	181	181	206	206	204	204	134	134	169	169	171	171	230	230	171	171	229	229	168
17	Olathe	pinto	Mark Brick - Colorado State Univ., Fort Collins	M	1980	B23/4/Dark Red Kidney/3/UI 78//UI 78/4500	110	110	162	162	188	188	153	153	269	269	183	183	99	99	175	175	224	224	139	139	125	125	151	151	181	181	203	203	204	204	134	134	169	169	171	171	236	236	171	171	229	229	168
185	Oregon 91G	green bean	OSU	A			151	151	161	161	187	187	153	153	258	258	183	183	99	99	184	184	225	225	143	143	125	125	155	155	181	181	251	251	191	191	134	134	167	167	171	171	217	217	171	171	216	216	168
147	Orion	great northern	Kelley Bean, Scottsbluff NE	M			110	110	164	164	190	190	153	153	269	269	183	183	99	99	178	178	224	224	149	149	125	125	155	155	181	181	206	206	189	189	134	134	169	169	171	171	227	227	171	171	227	227	168
121	Othello	pinto	Phillip Miklas- USDA -ARS Prosser, WA	M	1986	NW-410//Victor/Aurora	110	110	162	162	188	188	153	153	276	276	183	183	99	99	178	178	230	230	139	139	125	125	155	155	181	181	206	206	204	204	134	134	169	169	171	171	230	230	171	171	229	229	168
13	Ouray	pinto	Mark Brick - Colorado State Univ., Fort Collins	M	1972	Sanilac/UI 111/4/Dark Red Kidney/3/Pinto #4/4500//Pinto #5	110	110	162	162	188	188	153	153	269	269	183	183	99	99	175	175	230	230	139	139	125	125	151	151	181	181	206	206	187	187	130	130	169	169	171	171	232	232	171	171	227	227	168
57	P07863	pinto	Jim Kelly - Michigan State Univ., E. Lansing	M	2004	AN-37/P02630	110	110	162	162	188	188	137	137	256	256	183	183	99	99	178	178	224	224	147	147	125	125	151	151	181	181	206	206	187	187	134	134	171	171	171	171	236	236	177	177	227	227	168
168	Pink Panther	light red kidney	Ken Kmiecik, Seminis Vegetable Seeds	A			151	151	161	161	187	187	169	169	254	254	186	186	131	131	187	187	225	225	143	143	128	128	151	151	184	184	236	236	187	187	137	137	167	167	171	171	217	217	181	181	233	233	178
61	Poncho	pinto	ADM, Edible Bean Specialists Inc., Decatur	M			110	110	162	162	188	188	153	153	267	267	183	183	99	99	175	175	230	230	139	139	125	125	151	151	181	181	206	206	204	204	134	134	169	169	171	171	238	238	171	171	229	229	168
124	PT7-2	pinto	Phillip Miklas- USDA -ARS Prosser, WA	M			110	110	162	162	188	188	153	153	276	276	183	183	131	131	178	178	224	224	139	139	125	125	151	151	181	181	206	206	187	187	134	134	166	166	172	172	227	227	171	171	227	227	168
116	Quincy	pinto	Phillip Miklas- USDA -ARS Prosser, WA	M	2004	RR Othello//*Othello*/A-55	110	110	162	162	188	188	153	153	276	276	183	183	131	131	175	175	230	230	139	139	125	125	155	155	181	181	206	206	187	187	134	134	166	166	172	172	227	227	171	171	227	227	168
44	Raven	black	Jim Kelly - Michigan State Univ., E. Lansing	M	1994	N84004/B85009	110	110	164	164	190	190	137	137	278	278	183	183	99	99	187	187	224	224	139	139	125	125	151	151	184	184	206	206	199	199	134	134	166	166	172	172	227	227	171	171	227	227	168
49	Red Hawk	dark red kidney	Jim Kelly - Michigan State Univ., E. Lansing	A	1997	Charlevoix/Montcalm//Montcalm	151	151	161	161	187	187	169	169	254	254	186	186	131	131	175	175	225	225	143	143	128	128	151	151	184	184	282	282	187	187	137	137	167	167	171	171	215	215	181	181	233	233	178
192	Red Kanner	light red kidney	P. Griffiths/ Sandsted - Cornell University, Ithaca	A			151	151	161	161	187	187	169	169	254	254	183	183	131	131	175	175	225	225	139	139	125	125	151	151	184	184	236	236	187	187	134	134	167	167	171	171	217	217	181	181	233	233	178
90	Red Kloud	light red kidney	P. Griffiths/ Sandsted - Cornell University, Ithaca	A		early maturing selection from California Light Red Kidney	151	151	162	162	188	188	169	169	254	254	186	186	131	131	184	184	225	225	143	143	128	128	155	155	184	184	236	236	187	187	137	137	167	167	171	171	217	217	181	181	233	233	178
92	Red Kote	light red kidney	P. Griffiths/ Sandsted - Cornell University, Ithaca	A		a light red kidney resistant to BCMV	151	151	161	161	187	187	169	169	254	254	186	186	131	131	175	175	225	225	139	139	128	128	151	151	184	184	282	282	187	187	137	137	167	167	171	171	217	217	181	181	233	233	178
186	Redon	green bean	Seminis	A			151	151	161	161	187	187	153	153	254	254	183	183	99	99	197	197	225	225	139	139	125	125	155	155	184	184	282	282	201	201	134	134	169	169	171	171	236	236	171	171	233	233	178
142	Reliant	navy	Clyde Butcher, Gentec INC Twin Falls, ID	M			110	110	164	164	190	190	137	137	256	256	183	183	99	99	187	187	224	224	139	139	125	125	151	151	181	181	206	206	204	204	134	134	166	166	172	172	236	236	171	171	227	227	168
67	Remington	pinto	ADM, Edible Bean Specialists Inc., Decatur	M			110	110	162	162	188	188	155	155	258	258	183	183	99	99	175	175	224	224	139	139	125	125	151	151	181	181	206	206	187	187	134	134	169	169	171	171	232	232	171	171	227	227	168
187	Roma II	green bean	Syngenta	A	1980		151	151	161	161	187	187	159	159	249	249	186	186	116	116	184	184	225	225	143	143	128	128	151	151	184	184	258	258	191	191	137	137	171	171	171	171	217	217	171	171	227	227	168
194	Royal Red	dark red kidney	Phillip Miklas- USDA -ARS Prosser, WA	A			151	151	162	162	188	188	169	169	239	239	186	186	128	128	184	184	225	225	143	143	125	125	151	151	184	184	273	273	187	187	137	137	167	167	171	171	215	215	181	181	233	233	178
70	Sacramento	light red kidney	ADM, Edible Bean Specialists Inc., Decatur	A	1976	single plant selection from California Light Red Kidney	151	151	161	161	187	187	169	169	254	254	186	186	131	131	184	184	225	225	143	143	128	128	151	151	184	184	236	236	187	187	137	137	167	167	171	171	220	220	181	181	233	233	178
19	San Juan	pinto	Mark Brick - Colorado State Univ., Fort Collins	M			110	110	162	162	188	188	137	137	278	278	183	183	99	99	184	184	225	225	139	139	125	125	151	151	181	181	206	206	204	204	134	134	166	166	171	171	233	233	179	179	227	227	168
27	Sanilac	navy	Jim Kelly - Michigan State Univ., E. Lansing	M	1960	X-Ray mutant out of Michelite	110	110	162	162	188	188	153	153	276	276	183	183	99	99	178	178	224	224	139	139	125	125	155	155	181	181	206	206	204	204	134	134	169	169	171	171	224	224	171	171	227	227	168
56	Santa Fe	pinto	Jim Kelly - Michigan State Univ., E. Lansing	M	2008	P99119 (P94211/Matterhorn GN)/G99750(BDM-RMR-11/Matterhorn GN)	110	110	162	162	188	188	175	175	278	278	183	183	99	99	178	178	224	224	149	149	125	125	151	151	181	181	206	206	187	187	134	134	171	171	171	171	227	227	171	171	227	227	168
87	Sapphire	great northern	ADM, Edible Bean Specialists Inc., Decatur	M			110	110	162	162	188	188	153	153	280	280	183	183	99	99	178	178	224	224	149	149	125	125	151	151	181	181	206	206	189	189	134	134	169	169	171	171	232	232	171	171	227	227	168
96	Sawtooth	great northern	Shree Singh - University of Idaho, Kimberly	M	2008	Matterhorn / Starlight // Beryl / Weihing	110	110	162	162	188	188	137	137	258	258	183	183	99	99	178	178	224	224	139	139	125	125	151	151	181	181	208	208	189	189	134	134	171	171	172	172	238	238	171	171	227	227	168
78	Schooner	navy	ADM, Edible Bean Specialists Inc., Decatur	M	1989		110	110	164	164	190	190	137	137	278	278	183	183	99	99	175	175	224	224	139	139	125	125	151	151	184	184	206	206	204	204	134	134	166	166	171	171	238	238	177	177	227	227	168
81	Seabiskit	navy	ADM, Edible Bean Specialists Inc., Decatur	M			110	110	162	162	188	188	137	137	256	256	183	183	99	99	175	175	224	224	139	139	125	125	151	151	181	181	206	206	204	204	134	134	166	166	172	172	232	232	177	177	227	227	168
28	Seafarer	navy	Jim Kelly - Michigan State Univ., E. Lansing	M		Michelite X-ray mutant*5/Michelite X-ray mutant/Emerson 847/4/Michelite X-Ray Mutant*5/Michelite X-ray mutant/3/ Michelite/Trag 279-l//Michelite/Florida Belle	110	110	162	162	188	188	137	137	278	278	183	183	99	99	175	175	225	225	139	139	125	125	151	151	181	181	236	236	204	204	134	134	173	173	171	171	236	236	171	171	227	227	168
53	Seahawk	navy	Jim Kelly - Michigan State Univ., E. Lansing	M	2003	Bunsi / Huron	110	110	164	164	190	190	137	137	256	256	183	183	99	99	175	175	224	224	143	143	125	125	151	151	181	181	206	206	204	204	134	134	166	166	172	172	238	238	171	171	227	227	168
156	Sequoia	pinto	Bill Dean, Idaho Seed Bean	M			110	110	162	162	188	188	153	153	271	271	183	183	99	99	178	178	224	224	139	139	125	125	151	151	181	181	206	206	187	187	134	134	169	169	171	171	238	238	171	171	227	227	168
75	Shania	black	ADM, Edible Bean Specialists Inc., Decatur	M			110	110	164	164	190	190	137	137	258	258	183	183	99	99	187	187	224	224	147	147	125	125	151	151	184	184	206	206	199	199	134	134	166	166	172	172	236	236	177	177	227	227	168
18	Shiny Crow	black	Mark Brick - Colorado State Univ., Fort Collins	M	2001	Derived from a single plant selection in 1988 from a segregating experimental line obtained from CIAT	110	110	164	164	190	190	153	153	269	269	183	183	99	99	187	187	224	224	147	147	125	125	151	151	181	181	206	206	204	204	134	134	166	166	171	171	233	233	177	177	227	227	168
93	Shoshone	pinto	Shree Singh - University of Idaho, Kimberly	M	2008	H9657-42-2/3/ Poncho /G17341// Kodiak /BelDakMi-RMR-14	110	110	162	162	188	188	155	155	273	273	183	183	99	99	178	178	230	230	139	139	125	125	151	151	181	181	206	206	187	187	134	134	169	169	171	171	227	227	171	171	227	227	?
40	Sierra	pinto	Jim Kelly - Michigan State Univ., E. Lansing	M	1989	Derived from program of phenotypic recurrence involving crosses between 9 pinto cultivars and 16 navy bean cultivars	110	110	162	162	188	188	178	178	278	278	183	183	99	99	178	178	230	230	149	149	125	125	151	151	181	181	206	206	187	187	134	134	169	169	171	171	227	227	171	171	227	227	168
131	Silver Cloud	white kidney	Phillip Miklas- USDA -ARS Prosser, WA	A	1998	*Lisa*/*Linden*	151	151	162	162	188	188	169	169	239	239	186	186	131	131	184	184	225	225	143	143	128	128	151	151	184	184	273	273	187	187	137	137	167	167	171	171	217	217	181	181	233	233	178
74	Sonora	pinto	ADM, Edible Bean Specialists Inc., Decatur	M			110	110	162	162	188	188	153	153	273	273	183	183	99	99	178	178	224	224	147	147	125	125	155	155	184	184	206	206	204	204	134	134	169	169	172	172	236	236	171	171	227	227	168
134	Stampede	pinto	Juan Osorno- North Dakota State University, Fargo	M	2007	94-029-01-01/BDM-RMR-14	110	110	162	162	188	188	175	175	278	278	183	183	99	99	178	178	224	224	149	149	125	125	151	151	181	181	206	206	187	187	134	134	171	171	171	171	227	227	171	171	227	227	168
111	Starlight	great northern	Carlos Urrea - Univ. of Nebraska, Scottsbluff	M	1991	GN WM2-79-12 / GN SK-80-45	110	110	162	162	188	188	137	137	258	258	183	183	99	99	187	187	224	224	139	139	125	125	155	155	181	181	208	208	189	189	134	134	171	171	172	172	238	238	181	181	227	227	168
188	Strike	green bean	Seminis	A	1977		151	151	161	161	187	187	153	153	275	275	186	186	116	116	184	184	225	225	143	143	125	125	155	155	184	184	282	282	191	191	137	137	169	169	171	171	217	217	171	171	233	233	178
31	Swam Valley	navy	Jim Kelly - Michigan State Univ., E. Lansing	M	1982	NEP-2/Black Turtle Soup	110	110	164	164	185	185	137	137	256	256	186	186	99	99	187	187	225	225	149	149	125	125	151	151	184	184	206	206	187	187	137	137	167	167	172	172	227	227	177	177	233	233	168
58	T-39	black	Jim Kelly - Michigan State Univ., E. Lansing	M			110	110	164	164	190	190	137	137	258	258	183	183	99	99	187	187	224	224	149	149	125	125	151	151	184	184	206	206	204	204	134	134	166	166	172	172	236	236	179	179	227	227	168
110	Tara	great northern	Carlos Urrea - Univ. of Nebraska, Scottsbluff	M		GN Nebraska #1 sel. 27/GN 1140	110	110	162	162	188	188	153	153	280	280	183	183	99	99	178	178	224	224	139	139	125	125	151	151	181	181	206	206	189	189	134	134	169	169	171	171	232	232	171	171	227	227	168
189	Tendercrop	green bean	NPGS	A			151	151	161	161	187	187	153	153	275	275	186	186	116	116	184	184	225	225	143	143	125	125	155	155	184	184	282	282	191	191	137	137	171	171	171	171	217	217	179	179	233	233	178
62	Topaz	pinto	ADM, Edible Bean Specialists Inc., Decatur	M	1986		110	110	162	162	188	188	153	153	269	269	183	183	99	99	175	175	230	230	139	139	125	125	151	151	181	181	206	206	187	187	134	134	169	169	171	171	232	232	171	171	227	227	168
150	UC Linden	light red kidney	Steven Temple - Univ. of California, Davis	A			151	151	161	161	187	187	169	169	254	254	186	186	131	131	184	184	225	225	143	143	128	128	151	151	184	184	280	280	187	187	137	137	167	167	171	171	217	217	181	181	233	233	178
149	UC Nichols	dark red kidney	Steven Temple - Univ. of California, Davis	A			151	151	161	161	187	187	169	169	254	254	186	186	131	131	175	175	225	225	143	143	128	128	151	151	184	184	236	236	187	187	137	137	167	167	171	171	217	217	181	181	233	233	178
151	UC Red Kidney	light red kidney	Steven Temple - Univ. of California, Davis	A	1948	Michigan Dark Red Kidney/Maui Red Kidney	151	151	161	161	187	187	169	169	254	254	186	186	131	131	184	184	225	225	143	143	128	128	151	151	184	184	282	282	187	187	137	137	167	167	171	171	217	217	181	181	233	233	178
152	UC White Kidney	light red kidney	Steven Temple - Univ. of California, Davis	A			151	151	161	161	187	187	169	169	254	254	186	186	131	131	184	184	225	225	143	143	128	128	151	151	184	184	282	282	187	187	137	137	167	167	171	171	217	217	181	181	233	233	178
104	UI-111	pinto	Shree Singh - University of Idaho, Kimberly	M		Red Mex UI 34/Common Pinto	110	110	162	162	188	188	153	153	269	269	183	183	99	99	175	175	230	230	139	139	125	125	151	151	181	181	206	206	204	204	134	134	169	169	171	171	236	236	171	171	229	229	168
105	UI-114	pinto	Shree Singh - University of Idaho, Kimberly	M	1965	UI 111/GN J-378	110	110	162	162	188	188	153	153	269	269	183	183	99	99	175	175	230	230	139	139	125	125	151	151	181	181	206	206	204	204	134	134	169	169	171	171	238	238	171	171	229	229	168
98	UI-123	pinto	Shree Singh - University of Idaho, Kimberly	M			110	110	162	162	188	188	153	153	273	273	183	183	99	99	178	178	230	230	139	139	125	125	151	151	181	181	206	206	189	189	134	134	169	169	171	171	232	232	171	171	227	227	168
99	UI-196	pinto	Shree Singh - University of Idaho, Kimberly	M			110	110	162	162	188	188	153	153	269	269	183	183	99	99	187	187	230	230	139	139	125	125	151	151	181	181	206	206	204	204	134	134	169	169	171	171	230	230	171	171	229	229	168
106	UI-425	great northern	Shree Singh - University of Idaho, Kimberly	M			110	110	162	162	188	188	153	153	272	272	183	183	99	99	187	187	230	230	139	139	125	125	151	151	181	181	206	206	189	189	134	134	169	169	172	172	232	232	171	171	227	227	168
103	UI-59	great northern	Shree Singh - University of Idaho, Kimberly	M		selection from Common Great Northern	110	110	162	162	188	188	153	153	271	271	183	183	99	99	175	175	230	230	139	139	125	125	151	151	181	184	208	208	189	189	134	134	169	169	171	171	236	236	171	171	227	227	168
100	UI-906	black	Shree Singh - University of Idaho, Kimberly	M	1991	Midnight/4/[(PI 209621/2/R75/RR27/797)F5/3/Aurora]F3	110	110	164	164	190	190	137	137	276	276	183	183	99	99	184	184	224	224	147	147	125	125	151	151	181	181	206	206	201	201	134	134	166	166	172	172	227	227	177	177	227	227	168
101	UI-911	black	Shree Singh - University of Idaho, Kimberly	M	1993	Midnight/PI209621/2//R75/RR27/797/3 F5/Aurora	110	110	164	164	190	190	137	137	276	276	183	183	99	99	184	184	224	224	149	149	125	125	151	151	184	184	206	206	199	199	134	134	173	173	172	172	227	227	177	177	227	227	168
190	US #5 Refugee	green bean	OSU	A			110	110	162	162	188	188	153	153	272	272	183	183	99	99	187	187	230	230	139	139	125	125	151	151	181	181	206	206	189	189	134	134	169	169	172	172	232	232	171	171	227	227	168
102	US-1140	great northern	Shree Singh - University of Idaho, Kimberly	M			110	110	162	162	188	188	153	153	273	273	186	186	116	116	184	184	225	225	143	143	125	125	151	151	184	184	206	206	191	191	137	137	167	167	171	171	217	217	181	181	233	233	168
127	USDK-CBB-15	dark red kidney	Phillip Miklas- USDA -ARS Prosser, WA	M	2005	K97305/3/ SVM-2242//I9566-21-4-2/'Montcalm'	110	110	162	162	188	188	153	153	273	273	183	183	99	99	178	178	224	224	139	139	125	125	155	155	181	181	206	206	204	204	134	134	173	173	171	171	230	230	171	171	229	229	168
125	USPT-CBB-1	pinto	Phillip Miklas- USDA -ARS Prosser, WA	M			110	110	162	162	188	188	153	153	278	278	186	186	99	99	178	178	224	224	139	139	125	125	155	155	181	181	206	206	187	187	134	134	169	169	171	171	227	227	171	171	227	227	168
23	Verano	small white	Jim Beaver-Univ Puerto Rico Mayaguez	M	2007	DOR 364/WBB-20-1//Don Silvio/VAX 6	110	110	164	164	190	190	177	177	258	258	183	183	99	99	178	178	224	224	147	147	125	125	153	153	184	184	206	206	210	210	134	134	166	166	172	172	220	220	171	171	227	227	168
143	Vista	navy	Clyde Butcher, Gentec INC Twin Falls, ID	M	1990		110	110	164	164	190	190	137	137	256	256	183	183	99	99	187	187	224	224	139	139	125	125	151	151	181	181	206	206	204	204	134	134	166	166	172	172	227	227	171	171	227	227	168
80	Voyager	navy	ADM, Edible Bean Specialists Inc., Decatur	M			110	110	164	164	190	190	137	137	276	276	183	183	99	99	187	187	224	224	139	139	125	125	151	151	181	181	236	236	204	204	134	134	169	169	171	171	233	233	171	171	227	227	168
91	Wallace 773-V98	light red kidney	P. Griffiths/ Sandsted - Cornell University, Ithaca	A			151	151	161	161	187	187	153	153	254	254	186	186	131	131	184	184	225	225	143	143	125	125	151	151	181	181	236	236	187	187	137	137	167	167	171	171	217	217	181	181	233	233	178
113	Weihing	great northern	Carlos Urrea - Univ. of Nebraska, Scottsbluff	M	1998	GN Nebr. #1 Sel. 27, Tacaragua, Aurora, Pinto 12689 (CO), Pinto UI 111, GN 1140, GN Emerson, Bulgarian White, Pinto Ouray, A222 and A 51-1	110	110	162	162	188	188	153	153	269	269	183	183	99	99	187	187	224	224	147	147	125	125	151	151	181	181	206	206	189	189	134	134	171	171	171	171	238	238	171	171	227	227	168
162	Windbreaker	pinto	Ken Kmiecik, Seminis Vegetable Seeds	M			110	110	162	162	188	188	175	175	277	277	183	183	99	99	178	178	224	224	149	149	125	125	155	155	181	181	206	206	187	187	134	134	171	171	172	172	227	227	171	171	227	227	168
55	Zorro	black	Jim Kelly - Michigan State Univ., E. Lansing	M	2008	B00103*2/X00822	110	110	164	164	190	190	137	137	278	278	183	183	99	99	175	175	224	224	139	139	125	125	151	151	181	181	206	206	199	199	134	134	166	166	172	172	227	227	179	179	227	227	168
1Assigned gene pool by STRUCTURE with K=2 setting. A: Andean; M: Mesoamerican.
[truncated: 79 more columns]
